# Supplementary material for: Chronic administration of recombinant IL-6 upregulates lipogenic enzyme expression and aggravates high-fat-diet-induced steatosis in IL-6-deficient mice
Source: PubMed Central journal article supplement (PMC4486858; doi:10.1242/dmm.019166), 2015-07-01
Supplement: supp_019166_DMM019166supp.pdf [file supp_019166_DMM019166supp.pdf]

## SUPPLEMENTARY FIGURES

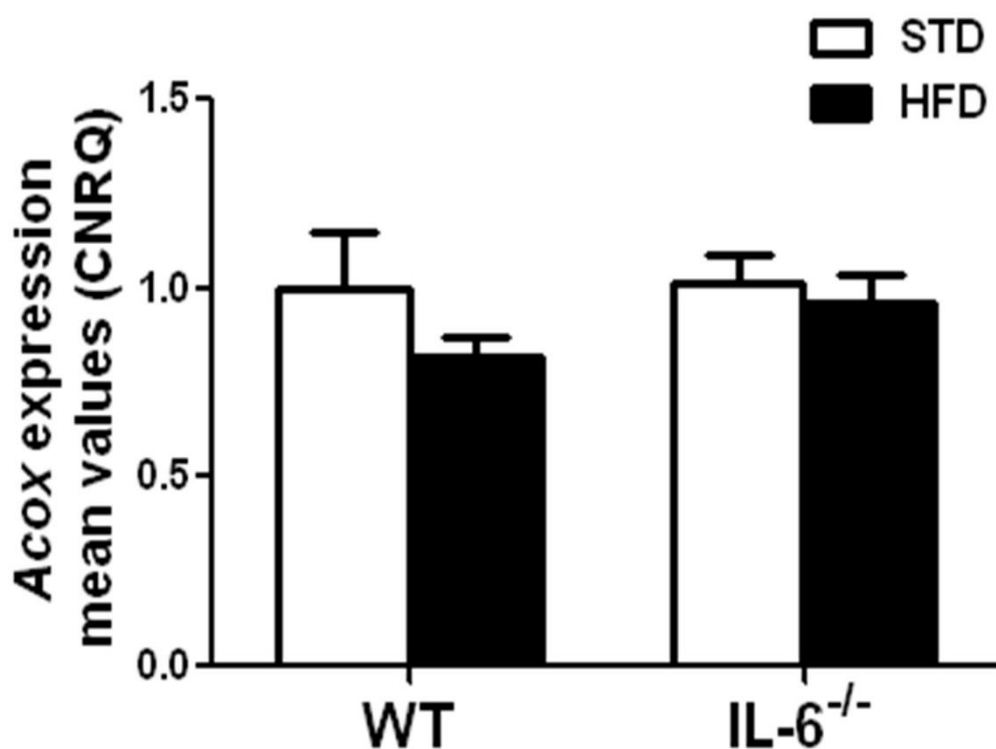

**Figure S1. Effect of a HFD on the *Acox* gene expression in the livers of WT and IL-6<sup>-/-</sup> mice.** Expression of *Acox* in the livers of WT and IL-6<sup>-/-</sup> mice fed STD or HFD determined through qPCR analysis. The Graph represents CNRQ means  $\pm$  SEM (n=4 animals per group) and gene expression was normalized using Biogazelle's qbase<sup>PLUS</sup> software with *Gapdh* and *Gus $\beta$*  as reference genes. Comparisons between groups were analyzed using two-way ANOVA analysis and Bonferroni *post-hoc* tests. The analysis revealed no significant effect of diet or genotype and no interaction between both factors.

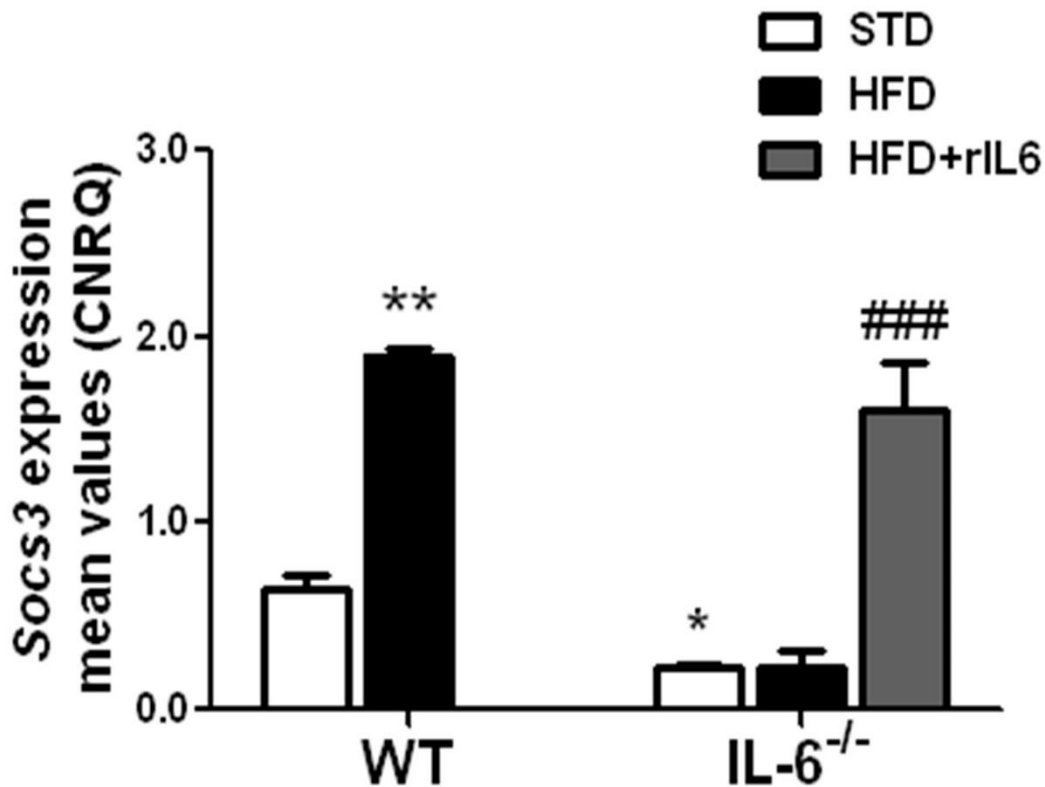

**Figure S2. Effect of IL-6 replacement on the *Socs3* gene expression in the livers of IL-6<sup>-/-</sup> mice fed HFD.** Expression of *Socs3* in the livers of WT and IL-6<sup>-/-</sup> mice fed STD or HFD. The *Socs3* expression in IL-6<sup>-/-</sup> mice fed HFD and chronically treated with rIL-6 is also depicted. The gene expression was determined through qPCR analysis and normalized using Biogazelle's qbase<sup>PLUS</sup> software with *Gapdh* and *Gusβ* as reference genes. The columns represent CNRQ means  $\pm$  SEM (n=4 animals per group) and comparisons between two groups were analyzed using Student's *t* test. \**P*<0.05, and \*\**P*<0.01 denote significant differences compared with the WT mice STD-fed group. ###*P*<0.001 denotes significant differences between IL-6<sup>-/-</sup> mice fed HFD and HFD + rIL-6 treated groups.

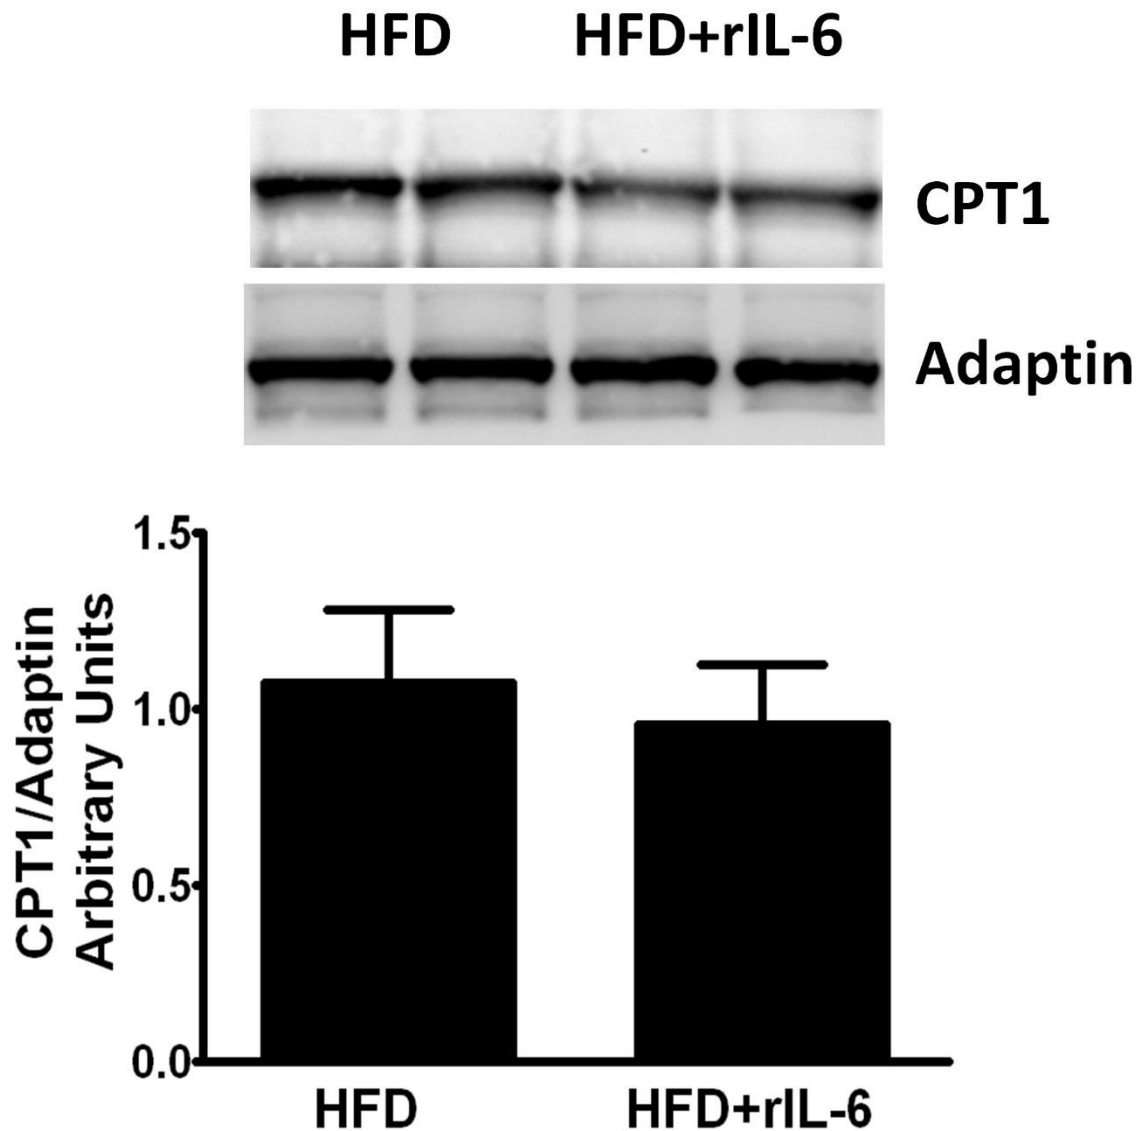

**Figure S3. Effect of rIL-6 treatment on the hepatic CPT1 protein expression in IL-6<sup>-/-</sup> mice fed HFD.** Western blot analysis of the CPT1 protein expression in liver samples from WT and IL-6<sup>-/-</sup> mice fed STD or HFD. Representative blot of protein from two samples per group is shown in the upper panel. The corresponding expression of Adaptin is also shown as a loading control per lane. The histogram depicts the means ± SEM (n=4 animals per group) of CPT1/Adaptin densitometric values. Analysis by Student's *t* test showed no significant differences between groups.

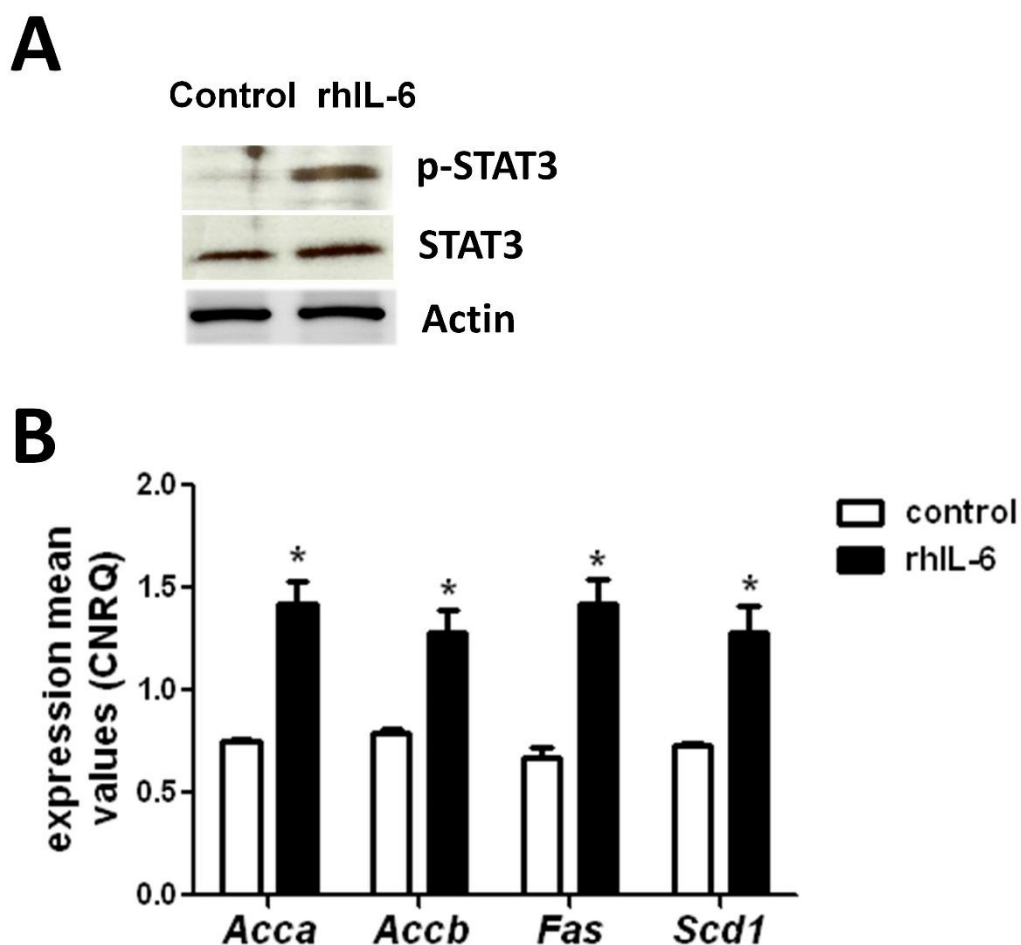

**Figure S4. Ability of recombinant human IL-6 to induce expression of lipogenic enzymes in HepG2 cells.** (A) Western blot of STAT3 and p-STAT3 expression after 1 h of rhIL-6 exposure in HepG2 cells compared with untreated sample (control). The corresponding expression of Actin is shown as a loading control per lane. (B) The histogram represents the expression of human *Acaca*, *Acacb*, *Fasn* and *Scd1* genes in the HepG2 cells untreated (control) or treated with hrIL-6 for 6 h. The gene expression was determined through qPCR analysis and was normalized using Biogazelle's qbase<sup>PLUS</sup> software with *Gapdh* and *Gusβ* as reference genes. The columns represent CNRQ means  $\pm$  SEM (n=3 samples per group). Comparisons between control and hrIL-6 treated samples were analyzed using Student's *t* test. \* $P < 0.05$  denotes significant differences between hrIL-6-treated samples and the corresponding control.

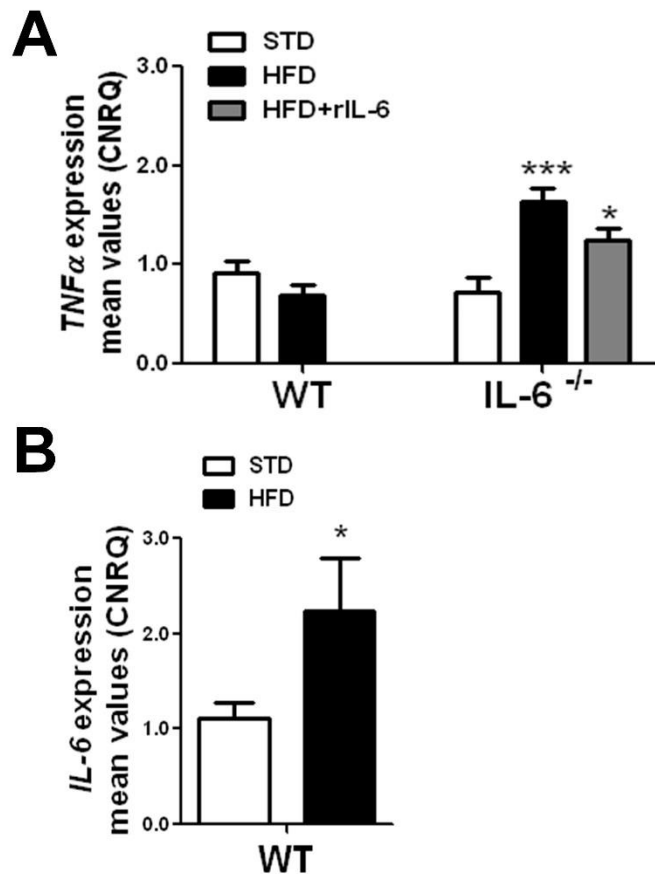

**Figure S5. Gene expression of *TNFα* and *IL-6* in the livers of WT and *IL-6*<sup>-/-</sup> mice fed HFD.** (A) Hepatic *TNFα* gene expression in WT and *IL-6*<sup>-/-</sup> mice fed STD and HFD. The effect of IL-6 replacement on *TNFα* expression in *IL-6*<sup>-/-</sup> mice fed HFD group is also shown. The *TNFα* expression was determined through qPCR analysis and was normalized using Biogazelle's qbase<sup>PLUS</sup> software with *Gapdh* and *Gusβ* as reference genes. The columns represent CNRQ means ± SEM (n=4 animals per group) and significance of differences between groups HFD fed and the corresponding groups STD fed was analyzed by Student's *t* test. \**P*<0.05, and \*\*\**P*<0.001 denote significant differences compared with the *IL-6*<sup>-/-</sup> mice STD-fed group. (B) Endogenous expression of the *IL-6* gene in liver samples from STD and HFD fed WT mice, determined through qPCR analysis as indicated in panel A. Student's *t* test analysis showed significant differences (\**P*<0.05) between STD-fed and HFD-fed groups.

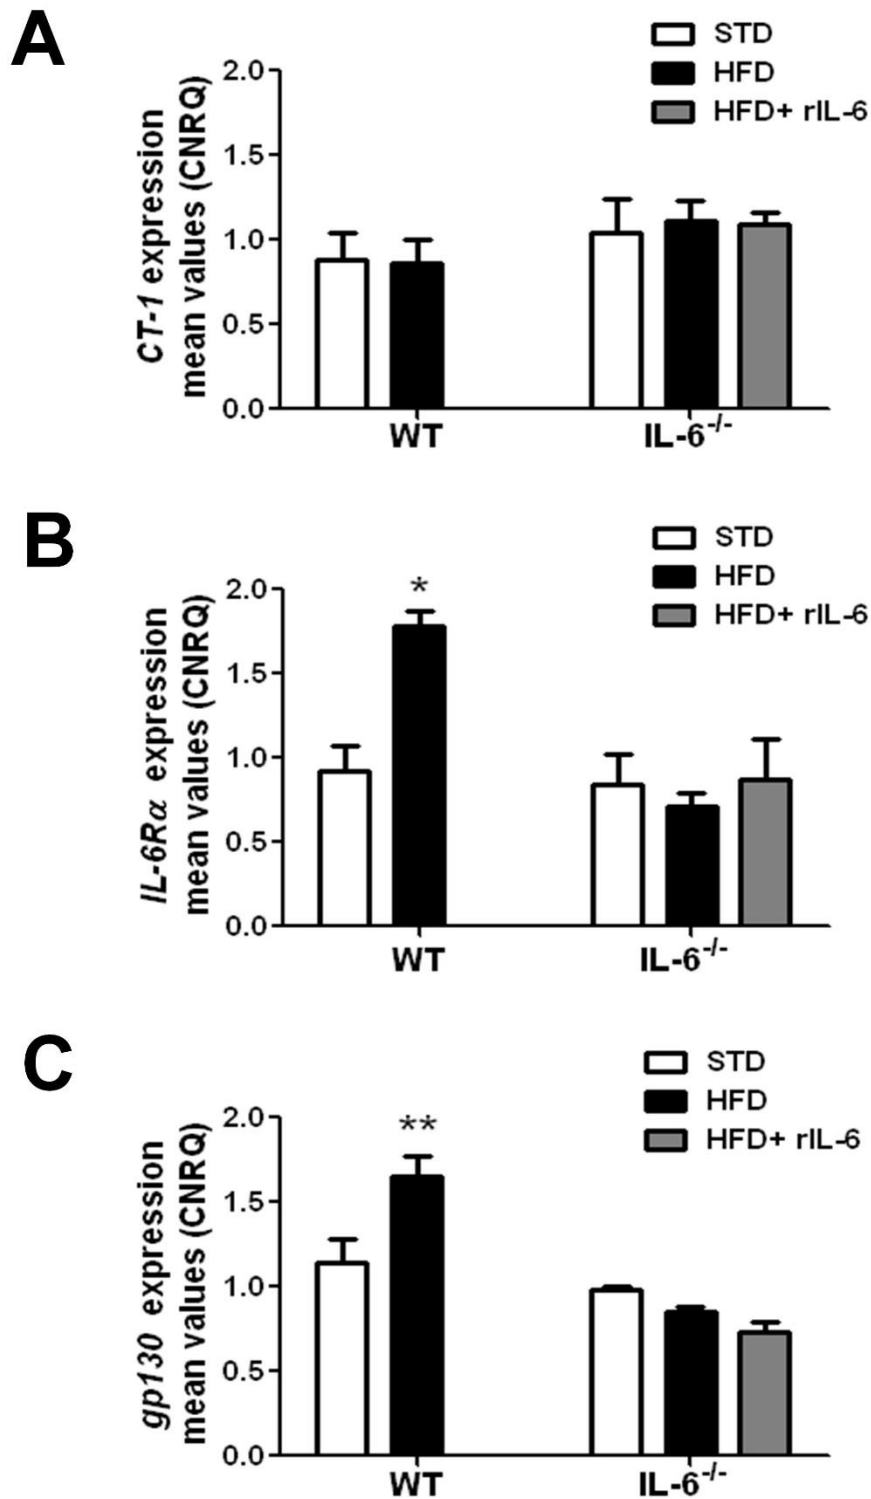

**Figure S6. Hepatic *CT-1* and *IL-6R/gp130* gene expression in WT and *IL-6*<sup>-/-</sup> mice fed HFD.** Analysis by qPCR for *CT-1* (A), *IL-6R* (B) and *gp130* (C) gene expression in livers of WT and *IL-6*<sup>-/-</sup> mice fed STD and HFD. Analysis of the effect of IL-6 replacement on the

hepatic expression of each gene in IL-6<sup>-/-</sup> mice fed HFD is also shown in the corresponding histogram. The gene expression was normalized by means of Biogazelle's qbase<sup>PLUS</sup> software using *Gapdh* and *Gusβ* as reference genes. The columns represent CNRQ means ± SEM (n=4 animals per group) and comparisons between two groups were analyzed by Student's *t* test. \**P*<0.05, and \*\**P*<0.001 denote significant differences compared with the WT mice STD-fed group.

**Table S1. Effect of genotype and diet on serum lipid parameters**

|                             | WT           |                  | IL-6 <sup>-/-</sup> |                        |
|-----------------------------|--------------|------------------|---------------------|------------------------|
|                             | STD          | HFD              | STD                 | HFD                    |
| <b>Cholesterol (mg/dl)</b>  | 86.25 ± 3.84 | 129.00 ± 7.65*** | 99.00 ± 7.65        | 209.00 ± 17.01***, ### |
| <b>HDL (mg/dl)</b>          | 21.00 ± 2.45 | 24.00 ± 2.12     | 22.00 ± 1.22        | 19.00 ± 3.24           |
| <b>Triglyceride (mg/dl)</b> | 60.00 ± 6.30 | 45.00 ± 13.25    | 131.00 ± 28.25&&&   | 77.00 ± 8.03 ***,#     |

Data represent means ± SEM (n=4 animals per group)

\*\*\* $P < 0.001$ ; significant difference compared to the corresponding STD-fed group.

&&& $P < 0.001$ ; significant difference between both STD-fed groups.

# $P < 0.05$ ; ### $P < 0.001$ ; significant difference between both HFD-fed groups.



Table 2S.

## Mouse primer sequences used for qPCR

| <i>Gene Symbol</i> | <i>Gene ID</i> |    | <b>Primer sequence 5' to 3'</b> | <b>GeneBank AN*</b> | <b>Amplicon length</b> |
|--------------------|----------------|----|---------------------------------|---------------------|------------------------|
| <i>Acaca</i>       | 107476         | Fw | GCGTCGGGTAGATCCAGTT             | NM_133360.2         | 70                     |
|                    |                | Re | CTCAGTGGGGCTTAGCTCTG            |                     |                        |
| <i>Acacb</i>       | 100705         | Fw | TGAATCTCACGCGCCTACTA            | NM_133904.2         | 61                     |
|                    |                | Re | GCCTCTCTTCACCAGATGGA            |                     |                        |
| <i>Fasn</i>        | 14104          | Fw | GCTGCTGTTGGAAGTCAGC             | NM_007988.3         | 76                     |
|                    |                | Re | AGTGTTTCGTTCCCTCGGAGTG          |                     |                        |
| <i>Scd1</i>        | 20249          | Fw | TCCCTCCTGCAAGCTCTAC             | NM_009127.4         | 62                     |
|                    |                | Re | CAGAGCGCTGGTCATGTAGT            |                     |                        |
| <i>Tnfa</i>        | 21926          | Fw | TCTTCTCATTCTGCTTGTGG            | NM_013693           | 128                    |
|                    |                | Re | GGTCTGGGCCATAGAACTGA            |                     |                        |
| <i>CT-1</i>        | 13019          | Fw | GCCTCCGACTCCCAATTT              | NM_007795.1         | 75                     |
|                    |                | Re | CATGAGACAAAGTAAGGGTTACACA       |                     |                        |
| <i>Gapdh</i>       | 14433          | Fw | CGTCCCGTAGACAAAATGGT            | NM_008084           | 125                    |
|                    |                | Re | TCAATGAAGGGGTCGTTGAT            |                     |                        |
| <i>Gusβ</i>        | 110006         | Fw | CTCTGGTGGCCTTACCTGAT            | NM_010368.1         | 73                     |
|                    |                | Re | CAGTTGTTGTCACCTTCACCTC          |                     |                        |

## Mouse primer sequences used for TaqMan® Gene Expression Assays (Applied Biosystems)

| <i>Gene Symbol</i> | <i>Gene ID</i> |  | <b>Assay ID</b> | <b>GeneBank AN*</b> | <b>Amplicon length</b> |
|--------------------|----------------|--|-----------------|---------------------|------------------------|
| <i>IL-11</i>       | 16156          |  | Mm00434162_m1   | NM_008350.4         | 130                    |
| <i>OSM</i>         | 18413          |  | Mm1193966_m1    | NM_001013365        | 82                     |
| <i>IL-6</i>        | 16193          |  | Mm00446190_m1   | NM_031168.1         | 78                     |
| <i>Gapdh</i>       | 14433          |  | Mm99999915_g1   | NM_008084           | 107                    |
| <i>Gusβ</i>        | 110006         |  | Mm01197698_m1   | NM_010368.1         | 71                     |

\* Accession number

Fw=Forward

Rev=Reverse

**Table S3. Human primer sequences used for qPCR**

| <i>Gene Symbol</i> | <b>Gene ID</b> |    | <b>Primer sequence 5' to 3'</b> | <b>GeneBank AN*</b> | <b>Amplicon length</b> |
|--------------------|----------------|----|---------------------------------|---------------------|------------------------|
| <i>Acaca</i>       | 31             | Fw | TGCCGGCCAGTGCTATGCTG            | NM_198834.1         | 60                     |
|                    |                | Re | TGCTCCAGGTCGCTTGACGT            |                     |                        |
| <i>Acacb</i>       | 32             | Fw | AGCGGGCCATCCGGTTTGTT            | NM_001093.3         | 63                     |
|                    |                | Re | TGCTCCAGGTCGCTTGACGT            |                     |                        |
| <i>Fasn</i>        | 2194           | Fw | CAGGCACACACGATGGAC              | NM_004104.4         | 92                     |
|                    |                | Re | CGGAGTGAATCTGGGTTGAT            |                     |                        |
| <i>Scd1</i>        | 6319           | Fw | CCTACCTGCAAGTTCTACACCTG         | NM_005063           | 85                     |
|                    |                | Re | GACGATGAGCTCCTGCTGTT            |                     |                        |
| <i>Gusβ</i>        | 2990           | Fw | CGCCCTGCCTATCTGTATTC            | NM_000181.3         | 91                     |
|                    |                | Re | TCCCCACAGGGAGTGTGTAG            |                     |                        |
| <i>Rpl19</i>       | 6143           | Fw | GCTCTTTCCTTTCGCTGCT             | NM_000981.3         | 122                    |
|                    |                | Re | CATTGGTCTCATTGGGGTCT            |                     |                        |

\* Accession number

Fw=Forward

Rev=Reverse
